# Supplementary material
Source: Research Square preprint supplement (doi:10.21203/rs.3.rs-9719018/v1)
Supplement: Supplementary file 1 [file 568760504bf491877db1cb98.docx]

Figure S1


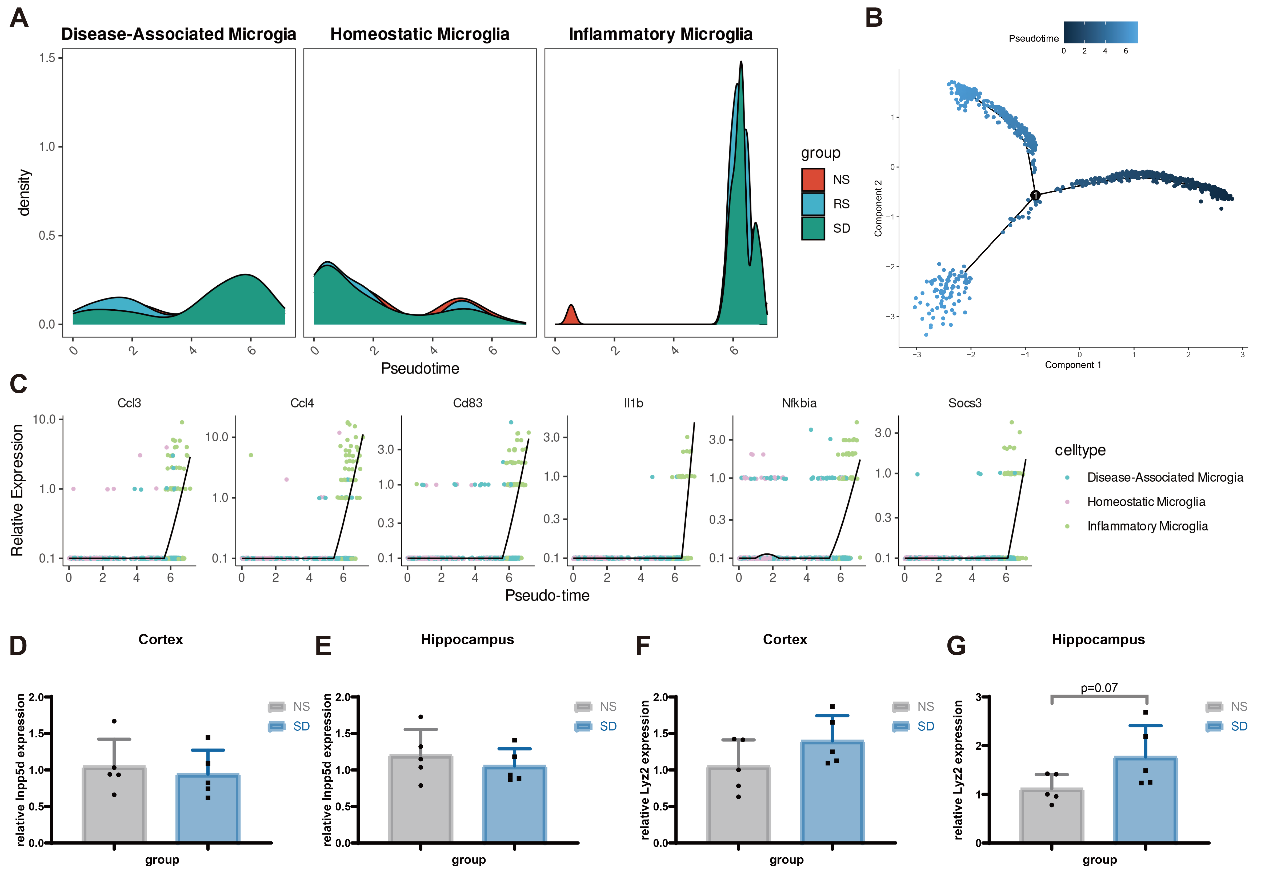


Figure S1. Transcriptomic analyses of microglial subpopulations.

﻿A. Pseudotime trajectory of microglial state transitions across NS, SD, and RS conditions, with cells colored by experimental group. B. Pseudotime trajectory colored by cell density. C. Expression heatmap of IFM signature genes (Ccl3, Ccl4, Cd83, Il1b, Nfkbia, Socs3) across HOM, DAM, and IFM subpopulations. D-G. qRT-PCR validation of Inpp5d (D, cortex; E, hippocampus) and Lyz2 (F, cortex; G, hippocampus) expression of NS and SD mice (n = 5). Data are presented as mean ± SEM.

Figure S2


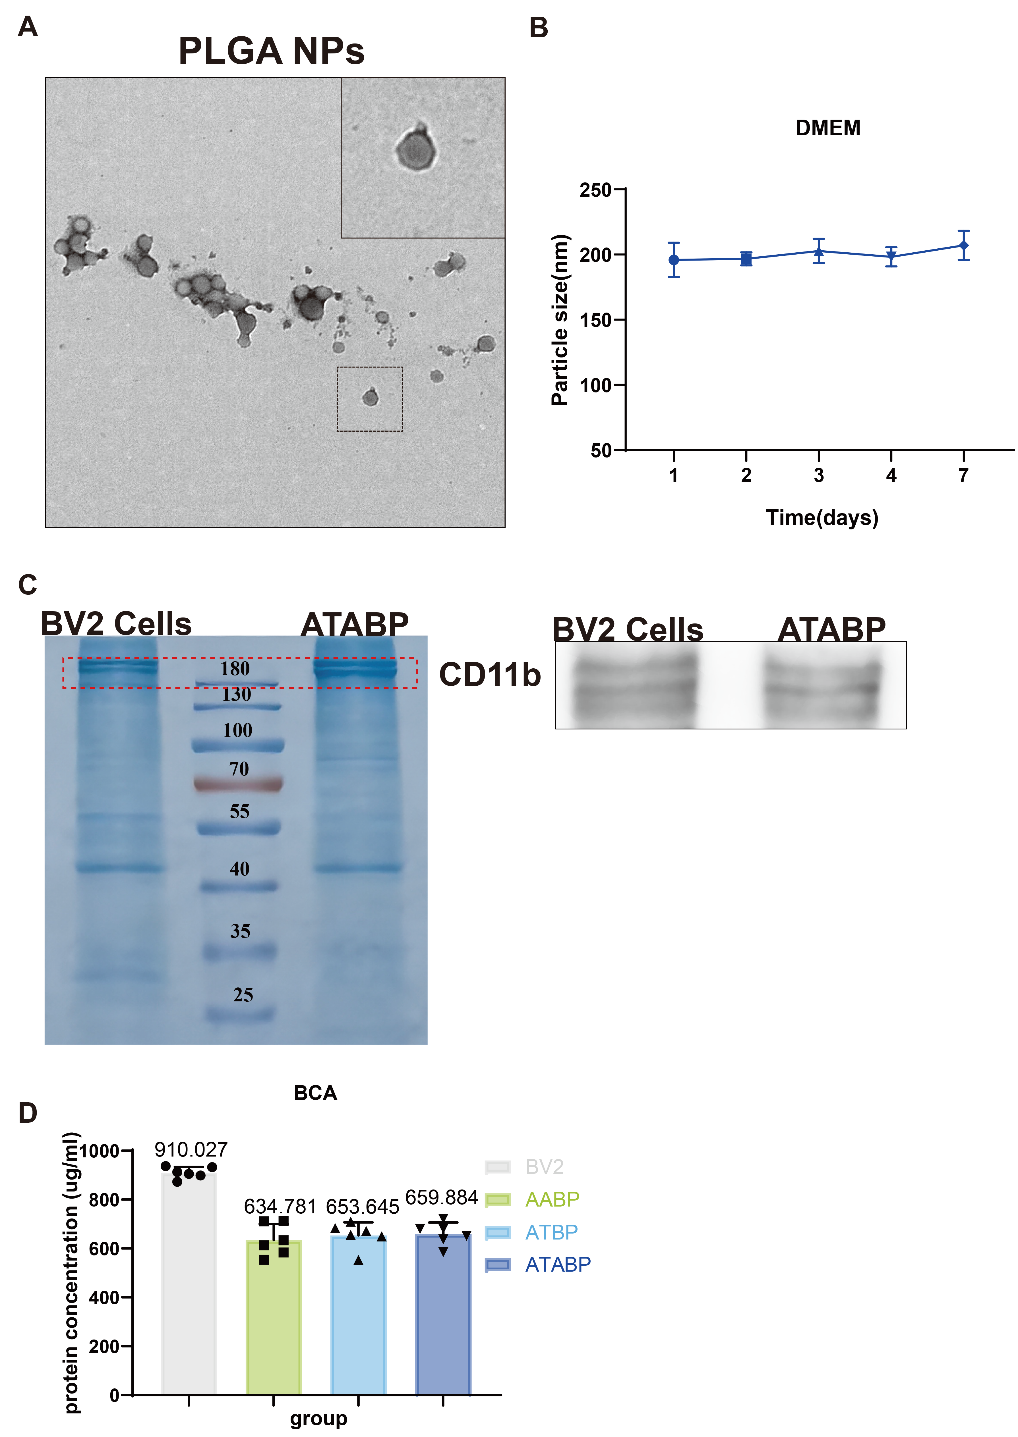


Figure S2. Additional characterization of nanoparticle physicochemical properties.

A. Transmission electron microscopy (TEM) images of bare PLGA nanoparticles at higher magnification. B. Stability assessment of ATABP in DMEM containing 10% FBS at −20°C over 7 days. C. Western blot (CD11b) and Coomassie Blue staining gels showing retention of microglial membrane proteins on ATABP. D. BCA protein quantification of membrane lysate, AABP, ATBP and ATABP, confirming successful membrane coating (n = 6). Data are presented as mean ± SEM.

Figure S3


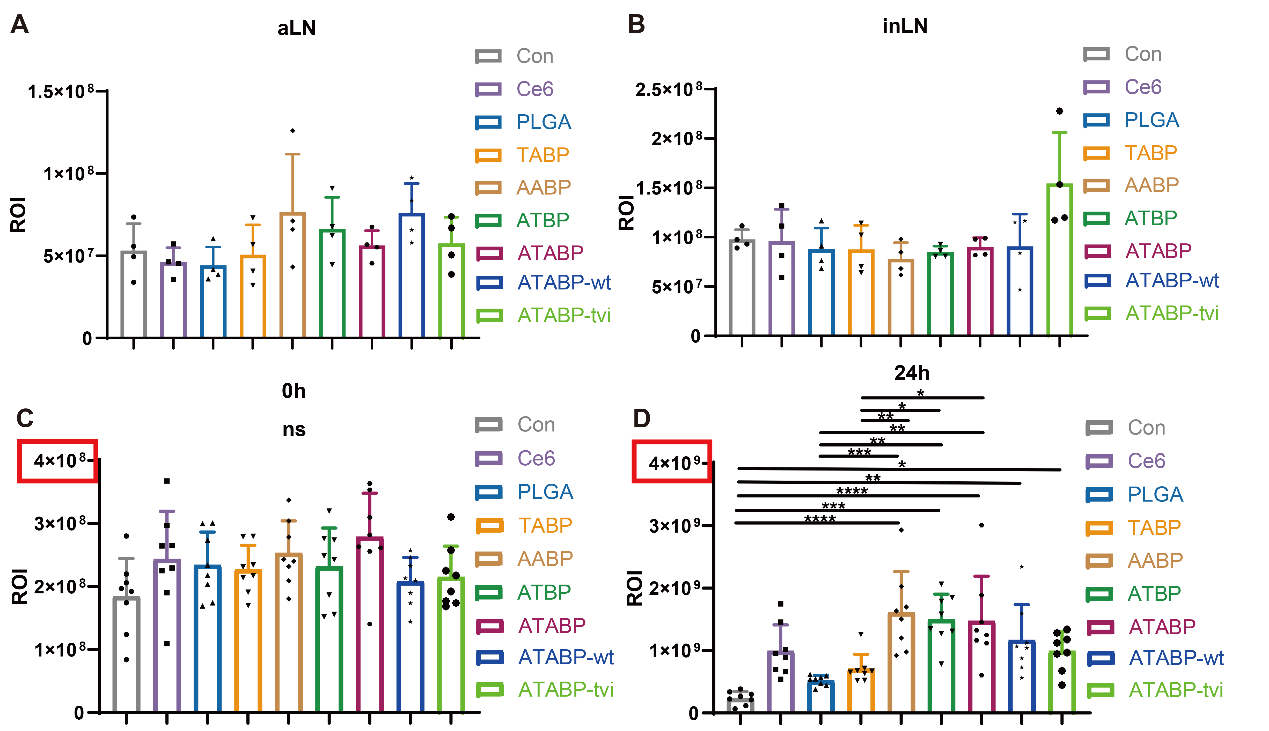


Figure S3. In vivo trafficking and biodistribution analyses.

A. Fluorescence imaging qualification of aLN and inLN 4 hours after subcutaneous injection of indicated nanoparticles into SD mice (n = 4). B. Quantification of fluorescence intensity in aLN and inLN, showing minimal accumulation across all groups. C-D. In vivo fluorescence imaging qualification of mice at 0(C) and 24 hours(D) after subcutaneous injection of nanoparticles. Data are presented as mean ± SEM. **P < 0.01 versus TABP group. *P < 0.05, **P < 0.01, ***P < 0.001, ****P < 0.0001.

Figure S4


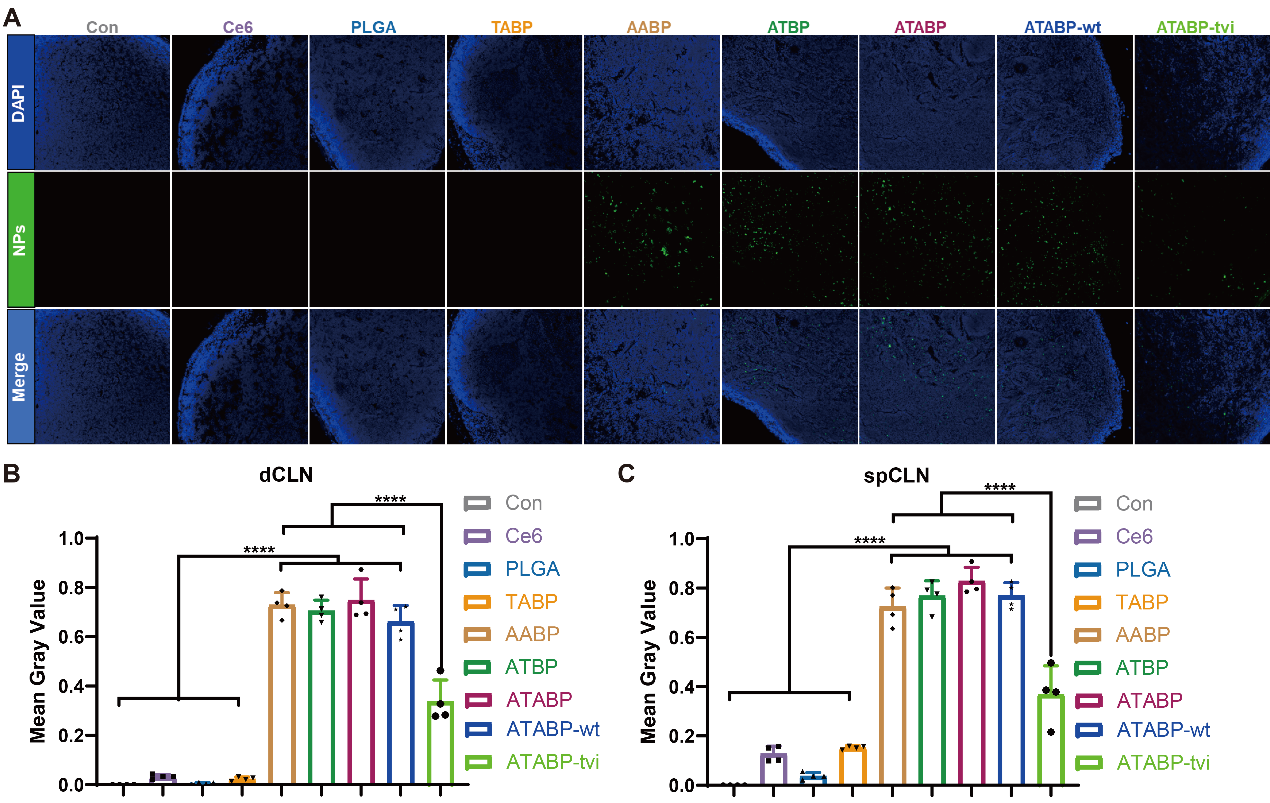


Figure S4. Immunofluorescence analysis of nanoparticle distribution in cervical lymph nodes.

A. Representative immunofluorescence images of deep cervical lymph nodes (spCLNs) from mice receiving PLGA, TABP, AABP, ATBP, or ATABP via subcutaneous injection, or ATABP via intravenous injection. B-C. Quantification of nanoparticle fluorescence intensity in dCLNs (B) and spCLNs (C) (n = 4). Data are presented as mean ± SEM. *P < 0.05, **P < 0.01, ***P < 0.001, ****P < 0.0001.

Figure S5


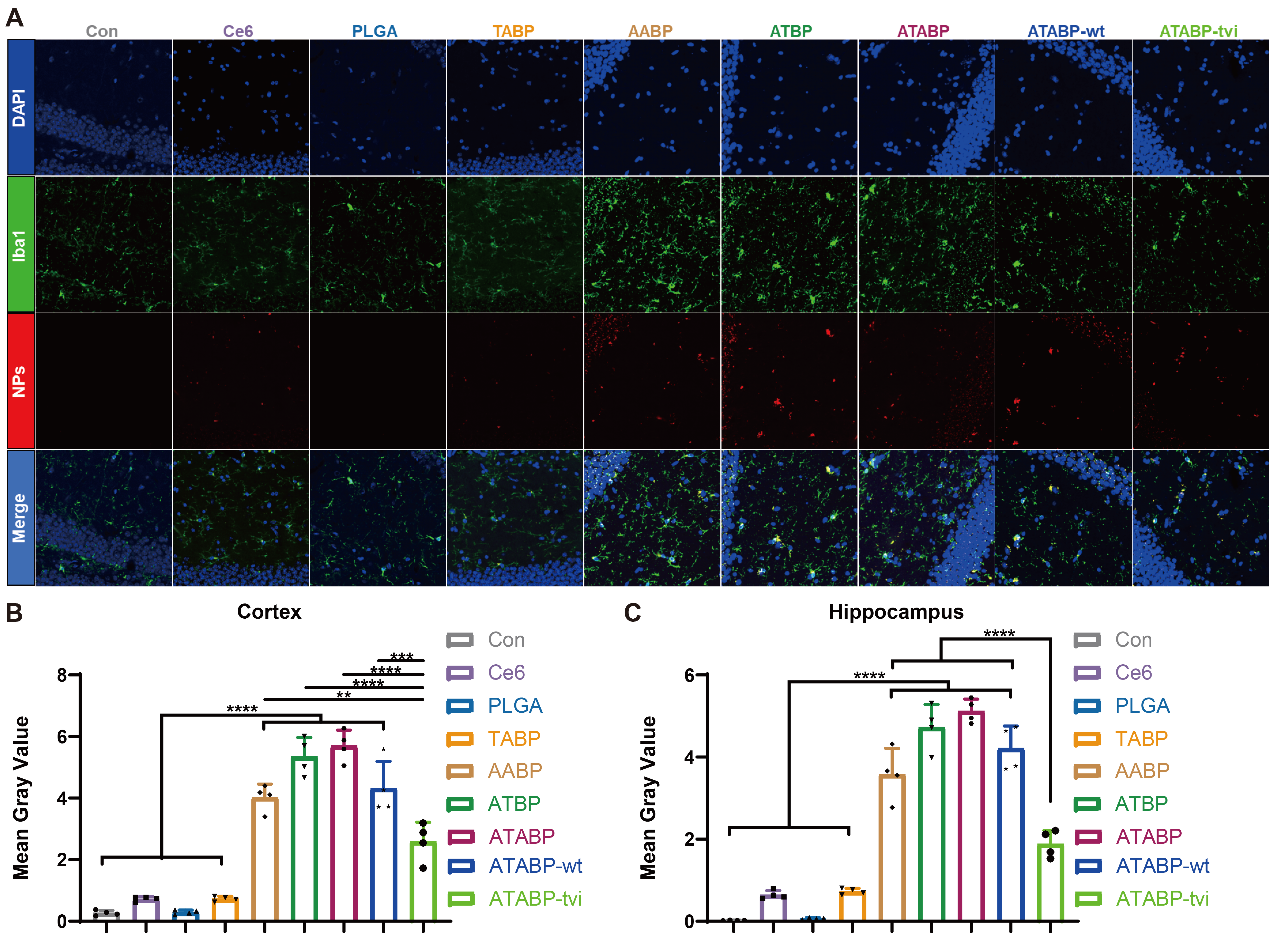


Figure S5. Additional immunofluorescence analysis of nanoparticle colocalization with brain microglia.

A. Representative confocal images of hippocampus sections, NPs= nanoparticles. B-C. Quantification of ATABP fluorescence intensity in cortex (B) and hippocampus (C) (n = 4). Data are presented as mean ± SEM. *P < 0.05, **P < 0.01, ***P < 0.001, ****P < 0.0001.

Figure S6


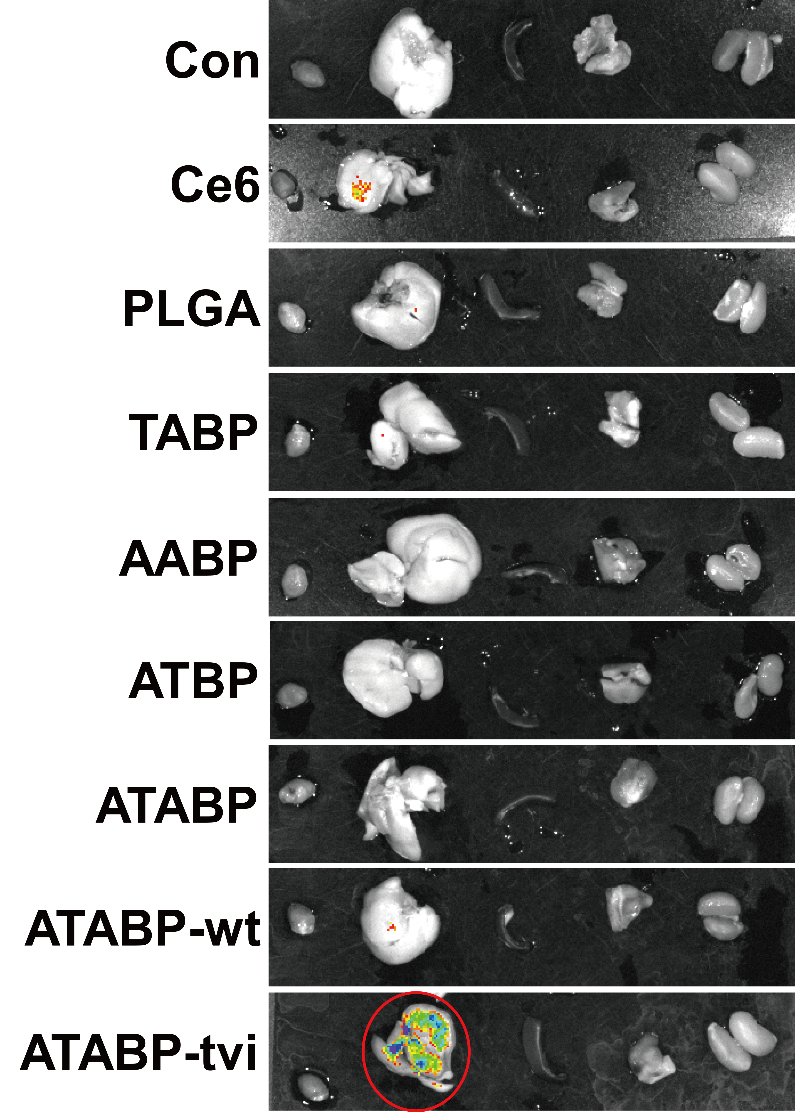


Figure S6. Biodistribution of nanoparticles in major peripheral organs.

Ex vivo fluorescence imaging of heart, liver, spleen, lungs, and kidneys 24 hours after subcutaneous or intravenous administration of ATABP or control nanoparticles (n = 4 per group).

Figure S7


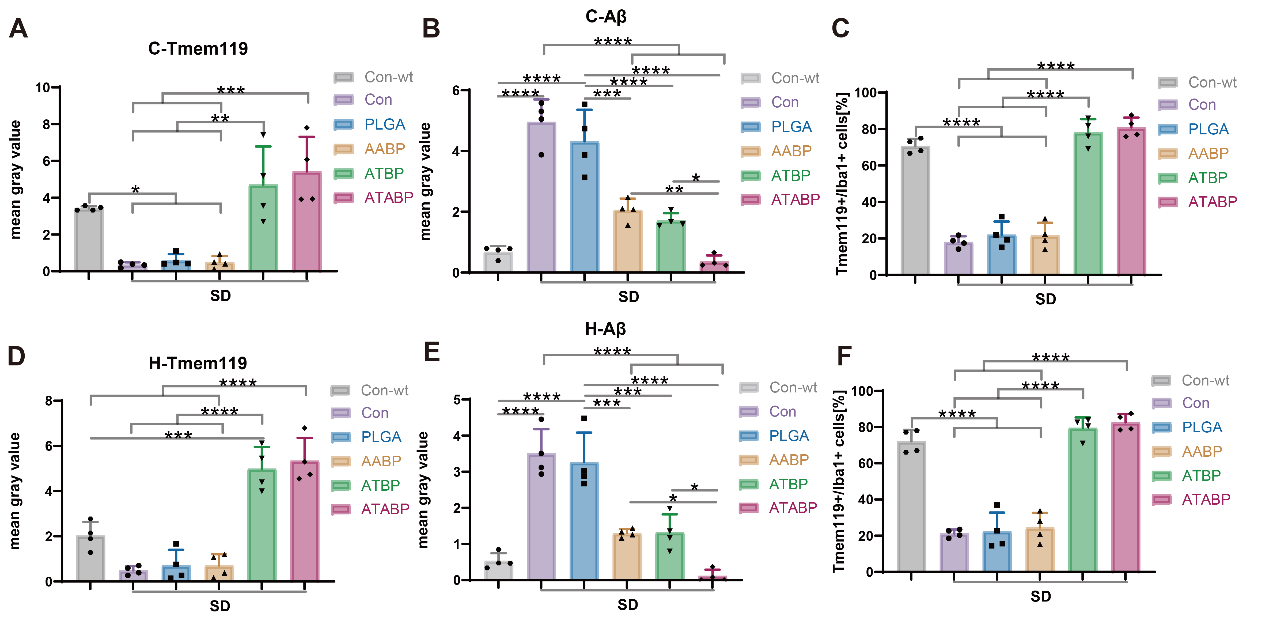


Figure S7. Additional immunofluorescence analyses of microglial homeostasis and Aβ clearance.

A-C. Immunofluorescence quantification of TMEM119 expression(A), Aβ plaque burden(B) and TMEM119+/Iba1+ microglia(C) in cortex after treatment (n = 4). D-E. Immunofluorescence quantification of TMEM119 expression(A), Aβ plaque burden(B) and TMEM119+/Iba1+ microglia(C) in hippocampus after treatment (n = 4). Data are presented as mean ± SEM. *P < 0.05, **P < 0.01, ***P < 0.001, ****P < 0.0001.

Figure S8


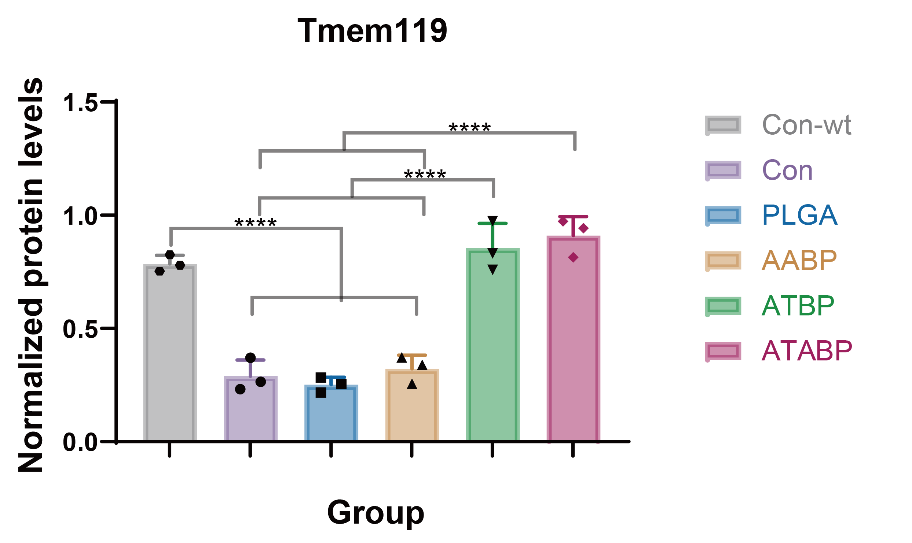


Figure S8. Quantitation of Western blot analysis Tmem119 expression in brain lysates. Brain lysates from SD mice treated with PBS, PLGA, AABP, ATBP, or ATABP. β-actin is shown as loading control.

Figure S9


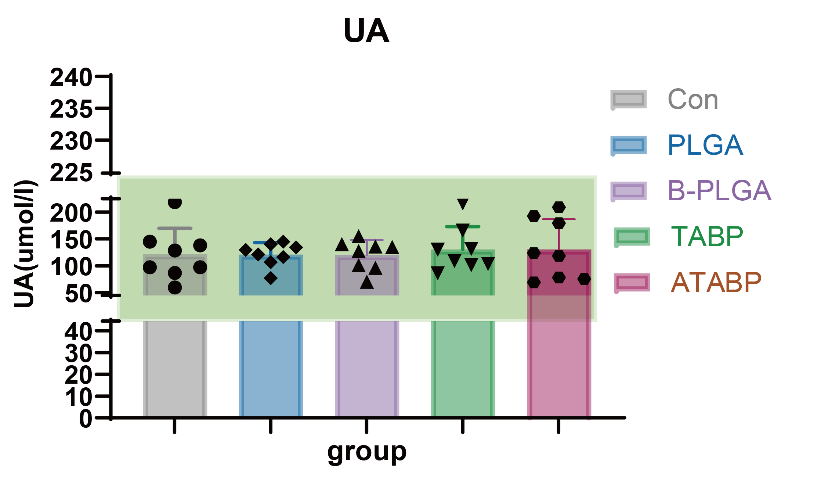


Figure S9. Serum biochemical analysis of kidney function marker-UA-7 days after injection (n = 8).
